# Supplementary material for: Paternal Induction of Hybrid Dysgenesis in Drosophila melanogaster Is Weakly Correlated with Both P-Element and hobo Element Dosage
Source: PubMed Central journal article supplement (PMC5427502; doi:10.1534/g3.117.040634), 2017-03-17
Supplement: 1487FigureS2.pdf [file 1487FigureS2.pdf]

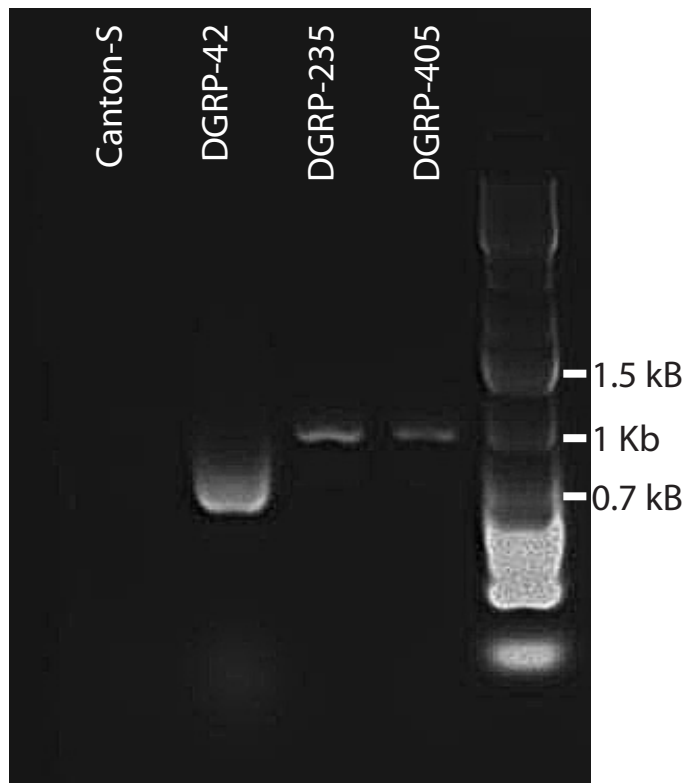

**Supplementary Figure 2. Amplification of Genomic *hobo* elements.** Hobo-CN primers were used to amplify canonical *hobo* elements (Deprá *et al.* 2009). Fragments amplified from DGRP-42 are the expected size for a full-length element (623 nt). ~ 1kB fragments from DGRP-235 and DGRP-405 correspond to longer structural variants. Canton-S genomic DNA exhibits no canonical *hobo* elements.
